# Supplementary material for: The Arabidopsis transcription factor IIB-related protein BRP4 is involved in the regulation of mitotic cell-cycle progression during male gametogenesis
Source: PubMed Central journal article supplement (PMC4036515; doi:10.1093/jxb/eru140), 2014-04-10
Supplement: supp_eru140_jexbot113563_file001.pdf [file supp_eru140_jexbot113563_file001.pdf]

**The *Arabidopsis* TFIIIB-related protein BRP4 is involved in the regulation of mitotic cell cycle progression during male gametogenesis**

Zhixiang Qin, Xiaoran Zhang, Xiao Zhang, Wei Xin, Jia Li and Yuxin Hu\*

Supplementary Data:

Supplementary Fig. S1-S5

Supplementary Table S1-S2

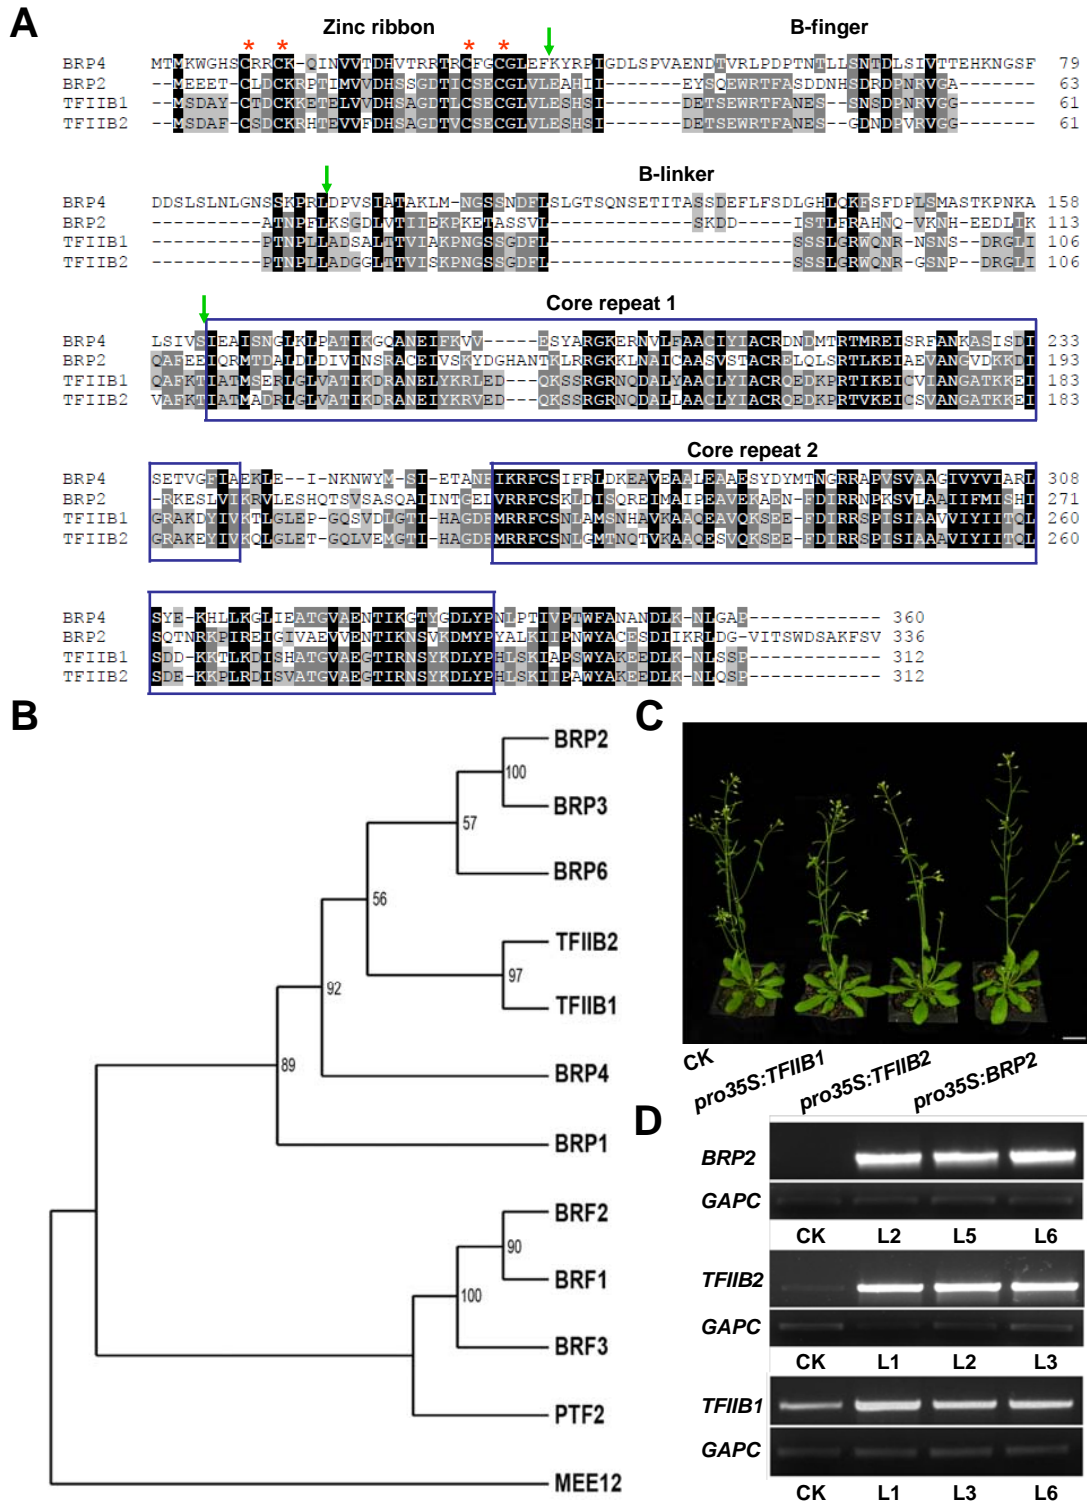

**Supplementary Fig. S1. Alignment and phylogenetic analysis of BRP4 and TFIIB-related proteins.**

(A) Sequence alignment of BRP4 with its close related homologues. Red stars refer to the Cys residues for zinc ribbon domain and green arrows to the borders of B-finger and B-linker domains. The blue boxes show the two core repeat domains. (B) Phylogenetic analysis of *Arabidopsis* TFB-like proteins. (C) Morphology of forty-day-old transgenic plants carrying an empty vector (CK), *pro35S:TFIIB1*, *pro35S:TFIIB2*, *pro35S:BRP2* construct, respectively. Scale bar: 2 cm. (D) Expression of *TFIIB1*, *TFIIB2*, *BRP2* in CK and their three independent transgenic plants (as L1 to L6), respectively.

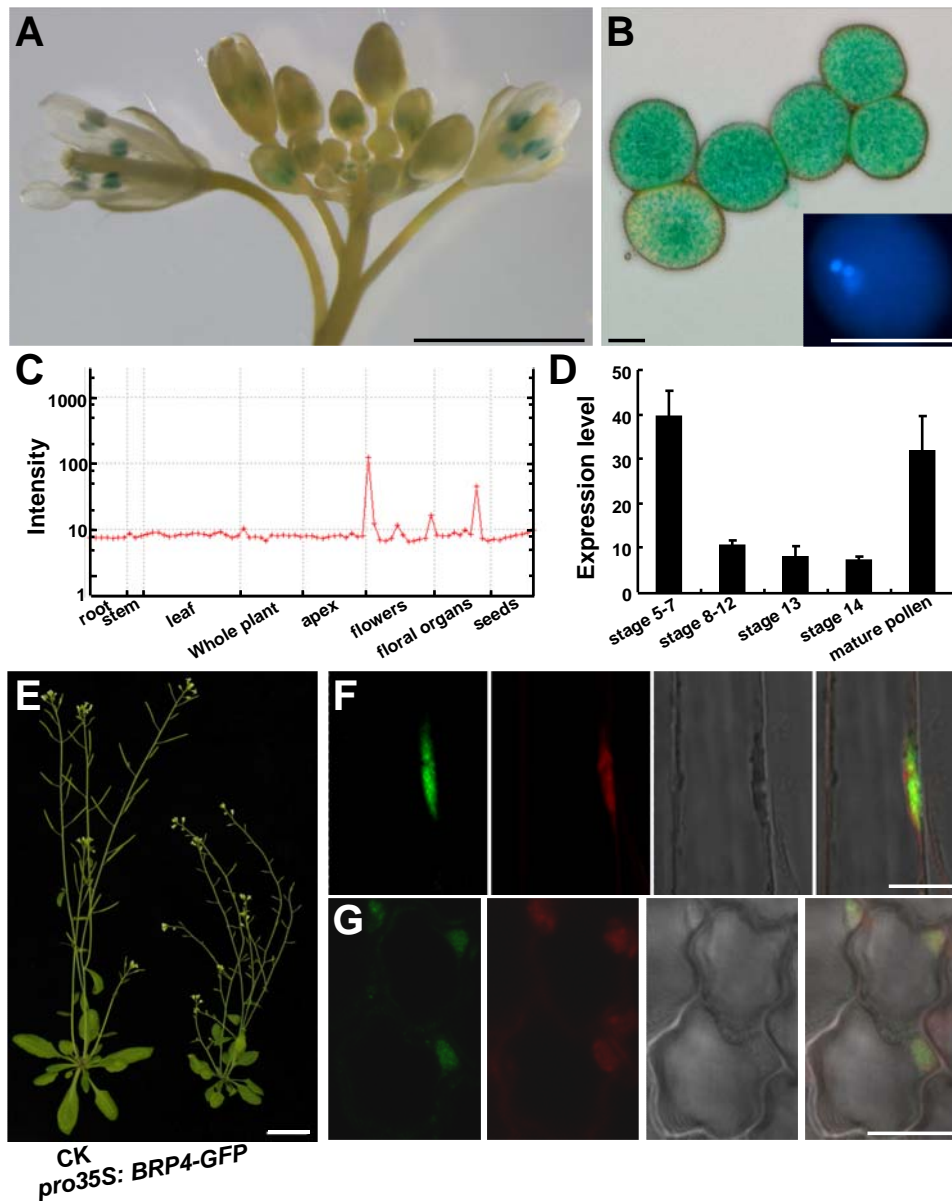

### Supplementary Fig. S2. Expression pattern and subcellular localization of BRP4.

(A) GUS staining of transgenic inflorescence carrying a *proBRP4:GUS* construct. Scale bar: 3mm. (B) GUS and DAPI staining of *proBRP4:GUS* mature pollen. Scale bar: 20 $\mu$ m. (C) Expression profile of *BRP4* in different organs revealed by AtGenExpress Visualization Tool (AVT) in TAIR database. (D) Expression level of *BRP4* in flowers at anther development stage 5-14 and in mature pollen revealed by *Arabidopsis* electronic Fluorescent Pictograph (eFP) browser in TAIR database. (E) Morphology of forty-day-old seedlings of CK and *pro35S:BRP4-GFP* plants. Scale bar: 2 cm. (F-G) Nucleus localization of BRP4-GFP protein in root (F) and petal (G) cells. Root and petal epidermal cells of transgenic plants carrying a *pro35S:BRP4-GFP* construct were used to determine fusion protein localization. The GFP signal, DAPI staining, bright-field and overlaid images are shown from left to right. Scale bar: 10  $\mu$ m.

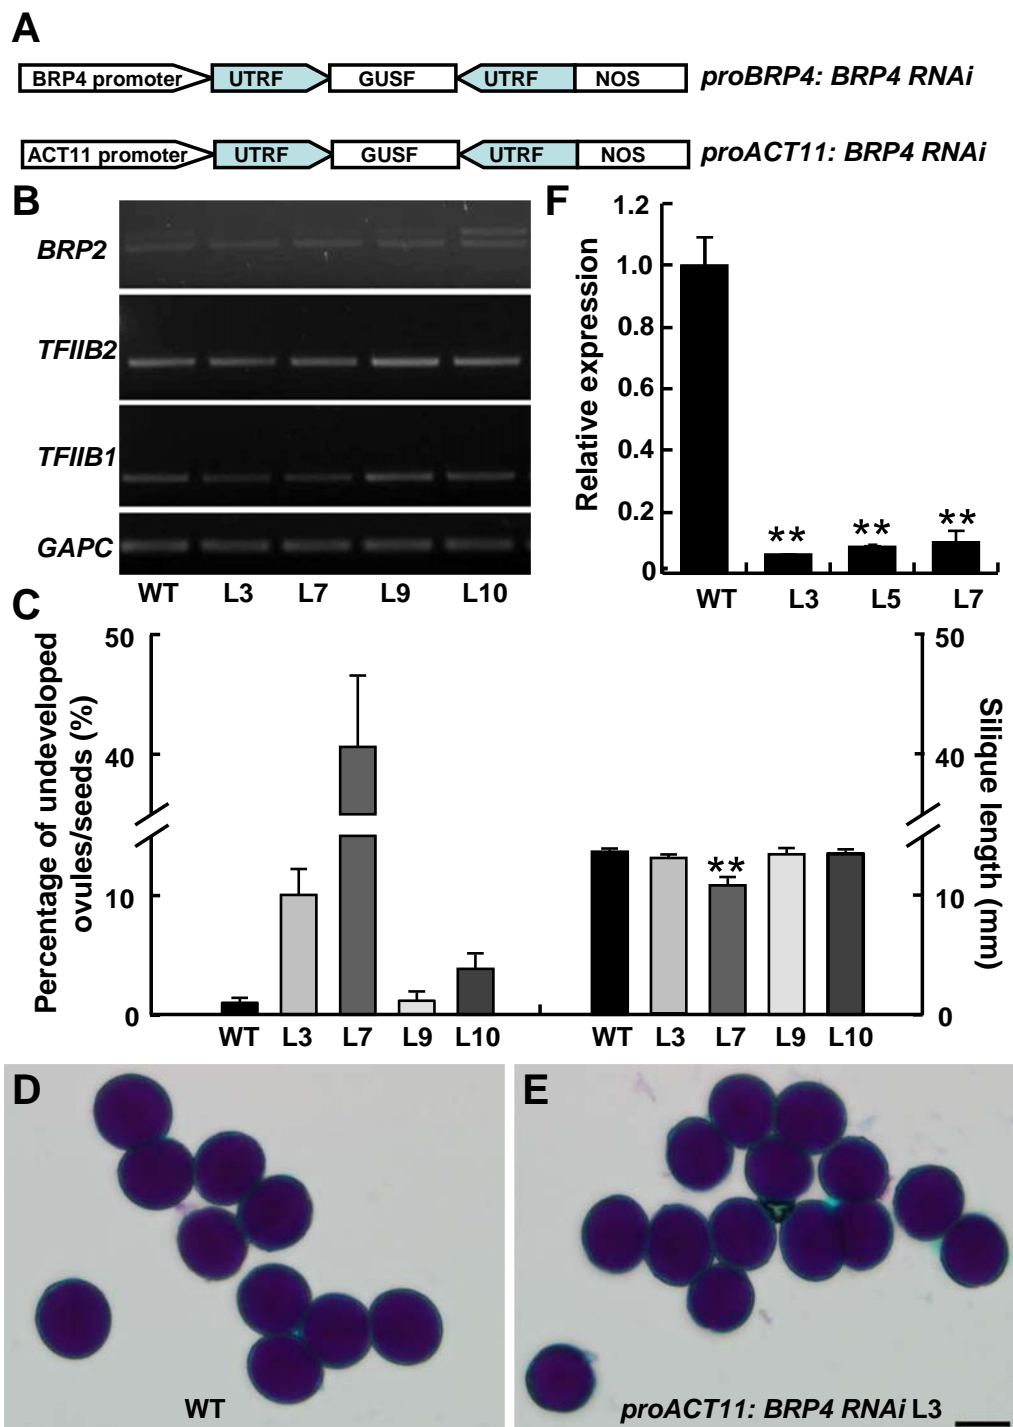

**Supplementary Fig. S3. Characterization of transgenic *proBRP4:BRP4 RNAi* and *proACT11:BRP4 RNAi* plants.**

(A) Schematic illustration of *proBRP4:BRP4 RNAi* and *proACT11:BRP4 RNAi* constructs. (B) Expression analysis of *TFIIB1*, *TFIIB2* and *BRP2* in WT and transgenic *proBRP4:BRP4 RNAi* inflorescences (L3, L7, L9 and L10). (C) Fertility analysis of WT and *proBRP4:BRP4 RNAi* siliques as described in (B). Sixteen siliques from eight plants were measured for each line and data are shown as mean values $\pm$ SD (Student's *t*-test, \*\**P*<0.01). (D-E) Alexander's staining of mature pollen in WT (D) and *proACT11:BRP4 RNAi* plants (E). Scale bar: 20  $\mu$ m. (F) Expression of *BRP4* in transgenic *proACT11:BRP4 RNAi* inflorescences. The data are from three biological replicates and shown as mean values $\pm$ SD (Student's *t*-test, \*\**P*<0.01).

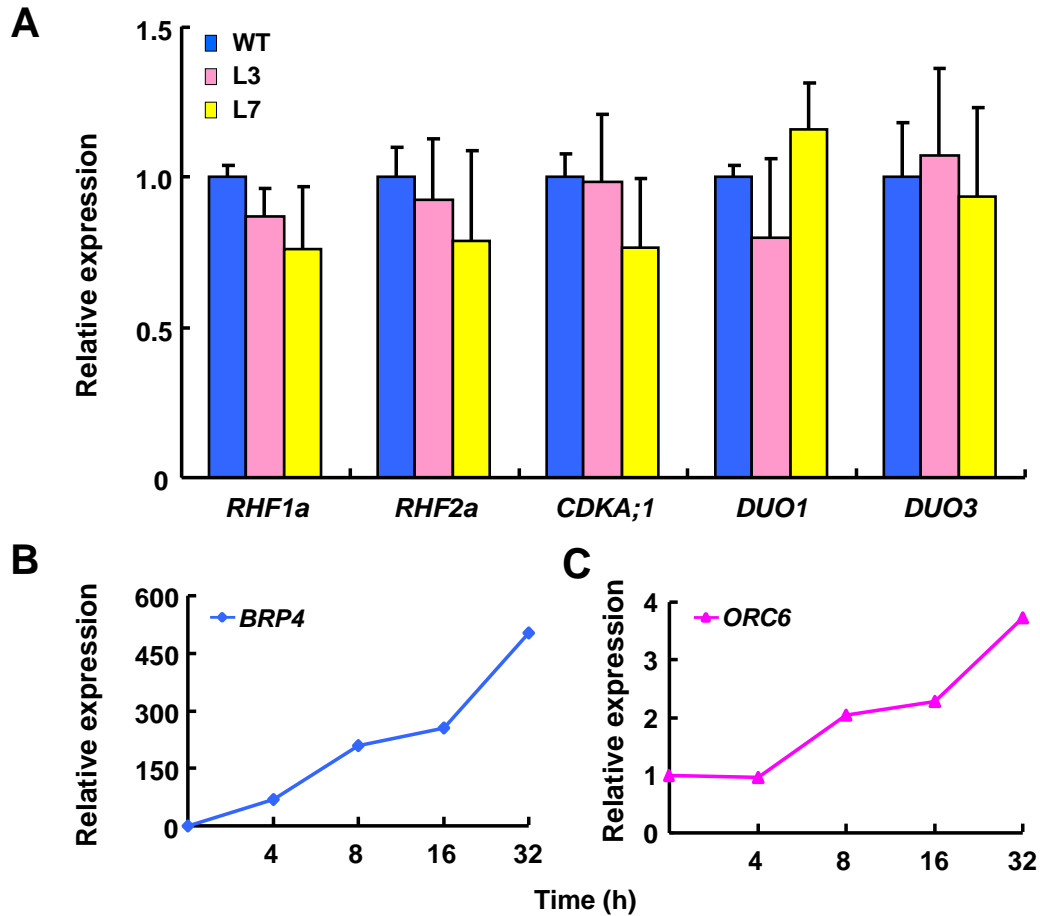

**Supplementary Fig. S4. Identification of genes downstream of *BRP4*.**

(A) Expression analysis of genes involved in mitotic cell cycle progression of male gametophytes in WT and transgenic *proBRP4:BRP4 RNAi* plants. (B-C) *ORC6* is up-regulated by expression of *BRP4*. The transgenic seedlings harboring a chemical-inducible *proXVE:BRP4* construct were treated with 10  $\mu\text{m}$  (+)17- $\beta$ -estradiol for times indicated, and expression levels of *BRP4* (B) and *ORC6* (C) were determined by qRT-PCR. The data are from three biological replicates.

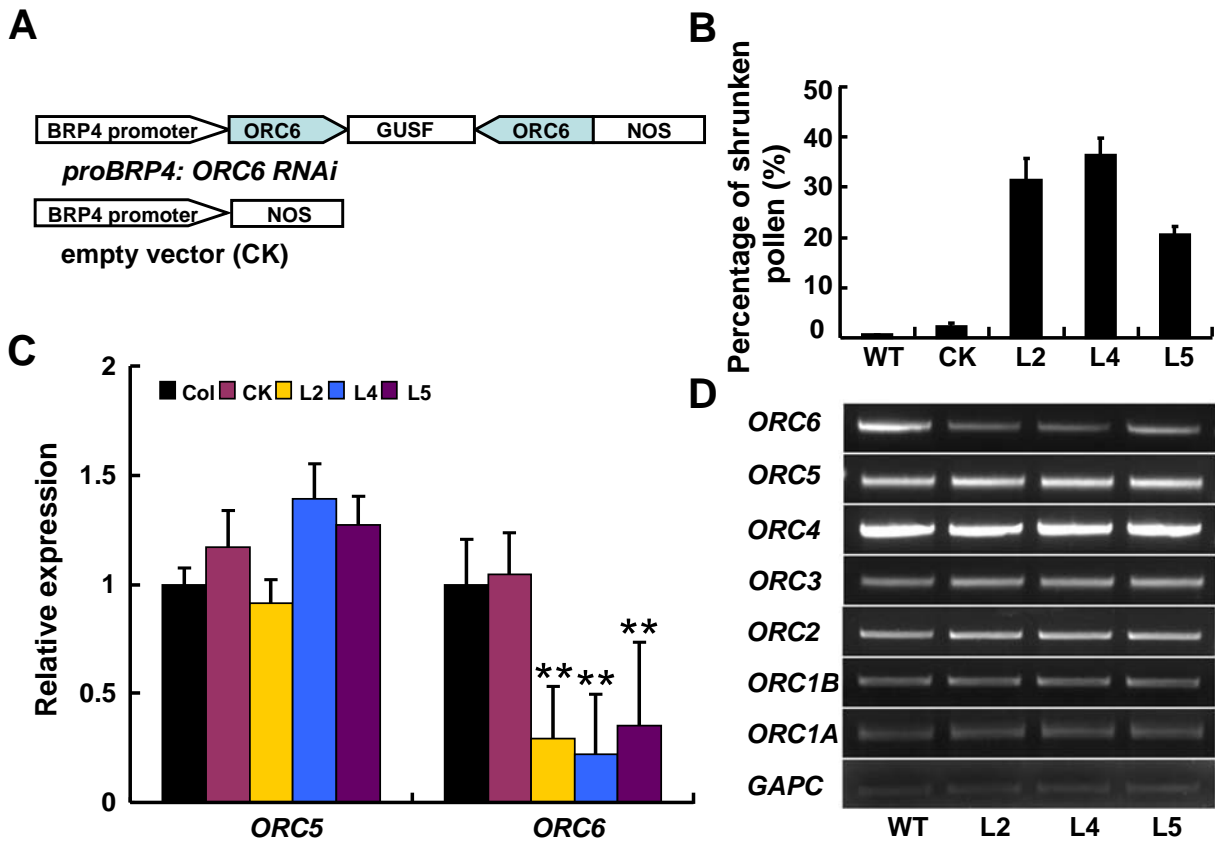

**Supplementary Fig. S5. Generation and characterization of transgenic *proBRP4:ORC6 RNAi* plants.**

(A) Schematic illustration of *proBRP4:ORC6 RNAi* construct and an empty vector containing only the *BRP4* promoter (CK). (B) Percentages of the shrunken pollen in WT, CK and transgenic *proBRP4:ORC6 RNAi* L2, L4 and L5 plants. (C) Expression of *ORC5* and *ORC6* in WT, CK and transgenic *proBRP4:ORC6 RNAi* lines as described in (B). The data are from three biological replicates and shown as mean values $\pm$ SD (Student's *t*-test, \*\* $P < 0.01$ ). (D) RT-PCR analysis of *ORC* genes in WT and transgenic *proBRP4:ORC6 RNAi* lines as described in (B).

**Supplementary Table S1.** The primers used for expression analysis in this study

| Primers    | Sequences (5'-3')             | Description            |
|------------|-------------------------------|------------------------|
| BRP4-QF    | TGTCACCACCGAGCACAGAATG        | qRT-PCR                |
| BRP4-QR    | TTCATCGGAAGAAGCAGTAATCGTC     |                        |
| BRP4-insiF | GCGACTCCATTGAAAGAAGA          | In-situ                |
| BRP4-insiR | TCAAGACCACACCCGAAG            |                        |
| RHF1a-QF   | TCTTTATCGTCTCTCTGCTATTTCCCA   | qRT-PCR                |
| RHF1a-QR   | CGAGGATGCTTCAGGTGATTTTG       |                        |
| RHF2a-QF   | TACAACATCTTCCAGTGGGGGTG       | qRT-PCR                |
| RHF2a-QR   | ATGTCCTTGACTTGACGACCTGC       |                        |
| DUO1-QF    | TTAAGTTAGAGCATCAGCCTTTCGC     | qRT-PCR                |
| DUO1-QR    | TGAGGGAGAGCGAACAATGGC         |                        |
| DUO3-QF    | AAGGAGAAGAAGGCTCAGAATGCG      | qRT-PCR                |
| DUO3-QR    | GCTACTCGGATCCAGACTCAACCAA     |                        |
| CDKA;1-QF  | GATTGGTGAAGGAAGTACGGTGTG      | qRT-PCR                |
| CDKA;1-QR  | GGAACACCTTCATCCTCCTGCTCTA     |                        |
| ORC6-QF    | CGCCGTCTTTGCGATGCTC           | qRT-PCR                |
| ORC6-QR    | TCAATTTAACCGCTGCTTGCCTAT      |                        |
| ORC4-F     | CGGCGGAGAAATCCCTAAATC         | RT-PCR                 |
| ORC4-R     | CTTTGCTCCTTCACTTCTAACCTCC     |                        |
| ORC1A-F    | AAAAAGTCAGGTCAAACACTTGTGG     | RT-PCR                 |
| ORC1A-R    | TCGAAACCCACGAACACTCT          |                        |
| ORC1B-F    | AAAAAGTCTGGTCAAAGTCAAACA      | RT-PCR                 |
| ORC1B-R    | TCAAACCTCCTCGCTTACTCTTCAA     |                        |
| ORC2-F     | ATGGAGGACATTGAGAACATAGAAGA    | RT-PCR                 |
| ORC2-R     | CTACTGATTGAGATCAAGCAAAAGCT    |                        |
| ORC3-F     | TTCACAAGGCTTCGTCTGGTAAT       | RT-PCR                 |
| ORC3-R     | CTCGTCACAGATGGCAAGTCAAA       |                        |
| ORC5-F     | AACTCAGAACCTATTGAATCCCACA     | RT-PCR                 |
| ORC5-R     | GCCATCATGAGGGTGACTAGAGA       |                        |
| CYCA2;1-QF | AGACCGAGTAATAACGAATGGCA       | qRT-PCR                |
| CYCA2;1-QR | TGCTTAGTTTCTTTACCACCTCGC      |                        |
| CCS52A2-QF | TGTGAACACGCCGCAGCA            | qRT-PCR                |
| CCS52A2-QR | AGCAGTGCCACCACCAGAAG          |                        |
| E2FB-QF    | AACAGGATTCAGTGAAGGGTCT        | qRT-PCR                |
| E2FB-QR    | TTTCAGTGACGAACAGTAACCTTTT     |                        |
| CYCB3;1-QF | GAACACTCTAAGGATTCCAACGCT      | qRT-PCR                |
| CYCB3;1-QR | ACCAACTGAGACCTTTTTCGGAT       |                        |
| CYCB2;4-QF | TTGTGCTGTCAAGAGACCATTCA       | qRT-PCR                |
| CYCB2;4-QR | CATCTGTTATGATTCTATCTAATGCTTCG |                        |
| CYCD2;1-QF | AACTATGGCGGCGGATTTACGA        | qRT-PCR                |
| CYCD2;1-QR | CGTTGCCGCCAAAGTTGTCGT         |                        |
| 57380-F    | GAAAGCACCATACCCAGGTT          | RT-PCR                 |
| 57380-R    | TATCCCAAGCATCAACGATGATTC      |                        |
| ORC5-QF    | CTCAGAACCTATTGAATCCCACA       | qRT-PCR                |
| ORC5-QR    | AAGAGTAGGGCAATCTAACGGC        |                        |
| ORC6-R     | TCTTTGGTCTCAGATTTCTTTGGGAA    | RT-PCR with<br>ORC6-QF |

**Supplementary Table S2.** The primers used for the generation of DNA constructs in this study

| Primers    | Sequences (5'-3')                 | Description                                                                    |
|------------|-----------------------------------|--------------------------------------------------------------------------------|
| 57370F     | ATGACGATGAAGTGGGGTCACA            | <i>pro35S:antiBRP4</i> construct and RT-PCR                                    |
| 57370R     | CTAAGGAGCTCCAAGGTTTTTCAG          |                                                                                |
| 57370-SF   | ctcgagccATGACGATGAAGTGGGGT        | <i>pro35S:BRP4</i> construct                                                   |
| 57370-SR   | aagcttCTAAGGAGCTCCAAGGTTTTTC      |                                                                                |
| BRP2F      | ggatccATGGAAGAAGAGACCTGCTTGGAC    | <i>pro35S:BRP2</i> construct and RT-PCR                                        |
| BRP2R      | gaattcTTATACTGAAAATTTTGCAGAATCCCA |                                                                                |
| TFIIB1F    | ggatccATGTCCGATGCGTATTGTACGG      | <i>pro35S:TFIIB1</i> construct and RT-PCR                                      |
| TFIIB1R    | gtcgacTCAAGGACTTGACAGGTTTTTCAGA   |                                                                                |
| TFIIB2F    | gtcgacATGAGTGACGCGTTTTGTTCGG      | <i>pro35S:TFIIB2</i> construct and RT-PCR                                      |
| TFIIB2R    | gaattcTCAAGGGCTTTGAAGGTTCTTGA     |                                                                                |
| BRP4-AscR  | ggcgcgccaAGGAGCTCCAAGGTTT         | <i>pro35S:BRP4-GFP</i> construct with 57370F                                   |
| ACT11F     | gaattcTCATATCTTCTGCTTTTCTGT       | <i>proACT11:BRP4 RNAi</i> construct-promoter fragment                          |
| ACT11R     | ggtaccTTTCTATATCCTGTCAAATT        |                                                                                |
| BRP4i-F    | gagctcGTGTTCTCTTGTCGCCGTTA        | <i>proBRP4:BRP4 RNAi</i> construct-promoter fragment                           |
| BRP4i-R    | ggtaccCGAAACCCTAATTTTCTGTCC       |                                                                                |
| BRP4-FF    | tctagaGCGACTCCATTGAAAGAAGA        | <i>proBRP4:BRP4 RNAi</i> and <i>proACT11:BRP4 RNAi</i> construct-RNAi fragment |
| BRP4-FR    | ctgcagTCAAGACCACACCCGAAG          |                                                                                |
| BRP4-RF    | ctcgagatctGCGACTCCATTGAAAG        |                                                                                |
| BRP4-RR    | atcgatTCAAGACCACACCCGAAG          |                                                                                |
| ORC6-FF    | tctagaGAGGTTTCTTGCGTCACTACCAG     | <i>proBRP4:ORC6 RNAi</i> construct-RNAi fragment                               |
| ORC6-FR    | ctgcagATCCCAACACAGTCAAAACAAAG     |                                                                                |
| ORC6-RF    | ggtaccGAGGTTTCTTGCGTCACTACCAG     |                                                                                |
| ORC6-RR    | ctcgagATCCCAACACAGTCAAAACAAAG     |                                                                                |
| BRP4-induF | ctcgagATGACGATGAAGTGGGGT          | <i>proXVE:AtBRP4</i> construct                                                 |
| BRP4-induR | actagtCTAAGGAGCTCCAAGGTT          |                                                                                |
| BRP4-F     | gtcgacAGGAGGATAATCTGATAG          | <i>proBRP4:GUS</i> construct                                                   |
| BRP4-R     | ggatccCGAAACCCTAATTTTCTGTCC       |                                                                                |
